# Supplementary material
Source: publisher figshare collection journal article supplement (https://sage.figshare.com/ndownloader/files/20020700)
Supplement: Supplementary file 1 [file 20020700]

# Online Supplement

## Appendix A

*Table 1: Search Terms for all relevant aspects of our search query with pseudonyms; asterisks indicate wildcards, quotation marks indicate all relevant permutations of a search term, if wildcards were no option due to an expected increase in noise*

| Dimensions of Search Query | Main Search Term          | Pseudonyms                                                                                                                                                                                                                                                                                                                                  |
|----------------------------|---------------------------|---------------------------------------------------------------------------------------------------------------------------------------------------------------------------------------------------------------------------------------------------------------------------------------------------------------------------------------------|
| (a) Digitalisation         | digital*                  | artificial, computer*, "pc", mobile, iphone*, "app", "apps", web, tablet*, ipad*, media, facebook, twitter, twitch, streaming, secondlife, minecraft, "mmo", "mmorpg", youtube, iTunes, electronic*, game*, gaming, play*, network*, blog*, "3D", cyber, virtual, "VR", "AR", "augmented reality", "virtual reality", interactiv*, internet |
| (b) AC Subfacet            | Culture                   | cultur*                                                                                                                                                                                                                                                                                                                                     |
|                            | Visual Arts               | "art", "arts"                                                                                                                                                                                                                                                                                                                               |
|                            | Museum                    | museum*                                                                                                                                                                                                                                                                                                                                     |
|                            | Music                     | music*, "sing", "singing", melod*, song*, orchestr*, choir*                                                                                                                                                                                                                                                                                 |
|                            | Performing Arts           | danc*, theatre*                                                                                                                                                                                                                                                                                                                             |
|                            | Literature                | "read", "reading"                                                                                                                                                                                                                                                                                                                           |
|                            | Photography               | photograph*                                                                                                                                                                                                                                                                                                                                 |
|                            | Movies                    | movie*, cinema*, film*                                                                                                                                                                                                                                                                                                                      |
|                            | Video Games               | game*                                                                                                                                                                                                                                                                                                                                       |
| (c) Education              | education*                | learn*, school*, student*, pupil*, college*, universit*, teach, teachers*, bildung, pedagogic*, social*, enjoyment*, engagement*, immersion*, cognitive, affective, motivation*, behaviour*, behavior*, emotion*, fun*                                                                                                                      |
| (d) Quantitative           | empirical*, quantitative* | Mean, regression*, correlation*, cluster, factor, path, model, cfa, efa, sem, bayes*, anova, "sample size", experiment*, longitudinal*, latent*, lisrel, mplus, spss, "sas"<br>Stata, "R", cronbach                                                                                                                                         |

## Appendix B

Table 2: Reduction of word count (WC) and unique word count (UWC) separately reported for each subsequent cleaning process.

| Cleaning processes |          |                        |                                              |                                |                        |                       |                                       |                      |
|--------------------|----------|------------------------|----------------------------------------------|--------------------------------|------------------------|-----------------------|---------------------------------------|----------------------|
| Title              | Variable | Corpus before cleaning | Deletion of copyright and non-English titles | Substitution of specific words | Deletion of stop words | Stemming of all words | Deletion of words with 4 hits or less | Total reduction in % |
|                    | WC       | 796,051                | 739,187                                      | 736,817                        | 480,773                | 470,282               | 429,828                               | 46.01                |
|                    | UWC      | 49,790                 | 36,775                                       | 36,768                         | 36,413                 | 26,185                | 5,320                                 | 89.32                |
|                    | WC/UWC   | 15.99                  | 20.1                                         | 20.03                          | 13.20                  | 17.96                 | 80.79                                 |                      |
|                    | M(WC)    | 14.33                  | 13.31                                        | 13.26                          | 8.66                   | 8.47                  | 7.75                                  | 45.92                |
|                    | SD(WC)   | 6.49                   | 4.58                                         | 4.57                           | 2.93                   | 2.88                  | 2.81                                  | 56.70                |
| Abstract           | Variable | Corpus before cleaning | Deletion of copyright and non-English titles | Substitution of specific words | Deletion of stop words | Stemming of all words | Deletion of words with 4 hits or less | Total reduction in % |
|                    | WC       | 11,657,752             | 11,350,979                                   | 11,337,303                     | 6,372,003              | 6,154,580             | 5,429,095                             | 53.43                |
|                    | UWC      | 128,958                | 123,033                                      | 122,997                        | 122,552                | 92,615                | 12,409                                | 90.38                |
|                    | WC/UWC   | 90.39                  | 92.26                                        | 92.18                          | 51.99                  | 66.45                 | 437.51                                |                      |
|                    | M(WC)    | 209.85                 | 204.33                                       | 204.08                         | 114.72                 | 110.81                | 97.74                                 | 53.42                |
|                    | SD(WC)   | 85.17                  | 85.43                                        | 85.39                          | 47.67                  | 46.37                 | 40.09                                 | 52.93                |
| Keywords           | Variable | Corpus before cleaning | Deletion of copyright and non-English titles | Substitution of specific words | Deletion of stop words | Stemming of all words | Deletion of words with 4 hits or less | Total reduction in % |
|                    | WC       | 500,089                | --                                           | 496,250                        | 455,361                | 449,025               | 416,128                               | 16.79                |
|                    | UWC      | 31,623                 | --                                           | 31,622                         | 31,359                 | 23,792                | 5,156                                 | 83.70                |
|                    | WC/UWC   | 15.81                  | --                                           | 15.69                          | 14.52                  | 18.87                 | 80.71                                 |                      |
|                    | M(WC)    | 9.00                   | --                                           | 8.93                           | 9.44                   | 9.31                  | 8.63                                  | 4.11                 |
|                    | SD(WC)   | 5.23                   | --                                           | 5.21                           | 4.00                   | 3.96                  | 3.67                                  | 29.83                |
| Source Title       | Variable | Corpus before cleaning | Deletion of copyright and non-English titles | Substitution of specific words | Deletion of stop words | Stemming of all words | Deletion of words with 4 hits or less | Total reduction in % |
|                    | WC       | 219,523                | --                                           | 218,924                        | 144,213                | 138,458               | 127,525                               | 41.91                |
|                    | UWC      | 3,757                  | --                                           | 3,759                          | 3,671                  | 3,214                 | 2,466                                 | 34.36                |
|                    | WC/UWC   | 58.43                  | --                                           | 58.24                          | 39.28                  | 43.08                 | 51.71                                 |                      |
|                    | M(WC)    | 3.95                   | --                                           | 3.94                           | 2.60                   | 2.49                  | 2.38                                  | 39.75                |
|                    | SD(WC)   | 1.85                   | --                                           | 1.85                           | 1.11                   | 1.09                  | 1.03                                  | 44.32                |

## Appendix C

### *Refinement via WC*

Words such as “child”, “children”, “adolescent” or “knowledge” were extracted as significant words for the score of education. Within the facets of aesthetics, for example, we extracted the word “library” for literature as a subfacet of AC activity, and regarding the negative score, we identified words such as “amino”, “acid” and “physics”.

### *Refinement via Term Frequency (tf)*

We also analysed the mean rank of term frequencies across all text objects to refine our list of significant words. This especially revealed significant words linked to digitalisation. For this facet, we extracted words such as “selfie”, “meme”, “troll”, and “gamify”. Within the facet of AC, “Shakespeare” was added as a significant word for performing arts and literature. “Lithium” was extracted as an additional negative significant word.

### *Refinement via tf-idf*

The analysis of words ranked via *tf-idf* resulted only in the extraction of negative significant words by including words such as “antibiotic”, “microbiology”, “graphene”, “fungal”, “orexin” and “midwives”.

### *Refinements after each Iteration*

After the first iteration, we manually screened the top  $n = 50$  words of included and excluded papers for each text object with log-ratios for *tf* and *tf-idf* (cf. Text Mining Statistics) resulted in further positive and negative significant words. On the one hand, “edutainment”, “postmodern”, “avatar” or “multiplayer” were words predominantly occurring in publications that were manually judged to be included. On the other hand, “neural”, “fluency”, “aphasia”, “brain”, “chemistry” or “psychometric” were words mainly

encountered in publications that were manually judged to be excluded. Subsequent iterations of this refinement process resulted in the extraction of additional significant words such as “warcraft”, “gbl”, “adventure”, “choreography”, “drinking”, “kinect”, “exergame”, “kindergarten”, “psychopathology”, “ancient”, “quantum” or “diaspora”. After each refinement, we reiterated the significance scoring process for each text object of each publication.

## Appendix D

*Table 3: Mean publication averaged significant scores in percent for included and excluded publications during manual screening.*

| Significance Score | Mean Excluded in % | Mean Included in % |
|--------------------|--------------------|--------------------|
| Culture            | 0.67               | 1.94*              |
| Visual Arts        | 0.00               | 0.14*              |
| Museums            | 0.03               | 0.41*              |
| Music              | 0.17               | 0.63*              |
| Performing Arts    | 0.16               | 0.15               |
| Literature         | 0.49               | 1.24*              |
| Film               | 0.11               | 0.35*              |
| Photography        | 0.11               | 0.57*              |
| Video Games        | 0.38               | 5.44*              |
| Digital            | 4.42               | 24.22*             |
| AC                 | 2.23               | 10.96*             |
| Education          | 9.32               | 14.01*             |
| Quantitative       | 1.63               | 1.67               |
| Positive           | 17.78              | 50.93*             |
| Negative           | 2.34               | 0.48*              |

Note: \*: significant difference between included and excluded mean significance scores analysed via t-tests.

## Appendix E

*Table 4: Total and relative frequencies of included publications with significance scores larger 0. All publications including publications research video games on the left side; all publications excluding publications researching video games on the right side.*

| Significance Score | Including video games                     |                                                | Excluding video games                     |                                                |
|--------------------|-------------------------------------------|------------------------------------------------|-------------------------------------------|------------------------------------------------|
|                    | publications with significance scores > 0 | % of publications with significance scores > 0 | publications with significance scores > 0 | % of publications with significance scores > 0 |
| Culture            | 332                                       | 19.9                                           | 249                                       | 30.0                                           |
| Visual Arts        | 43                                        | 2.6                                            | 38                                        | 4.6                                            |
| Museums            | 74                                        | 4.4                                            | 65                                        | 7.8                                            |
| Music              | 101                                       | 6.1                                            | 91                                        | 11.0                                           |
| Performing Arts    | 48                                        | 2.9                                            | 36                                        | 4.3                                            |
| Literature         | 203                                       | 12.2                                           | 164                                       | 19.7                                           |
| Film               | 110                                       | 6.6                                            | 99                                        | 11.9                                           |
| Photography        | 114                                       | 6.8                                            | 104                                       | 12.5                                           |
| Video Games        | 836                                       | 50.1                                           | n.a.                                      | n.a.                                           |
| Digital            | 1653                                      | 99.2                                           | 820                                       | 98.7                                           |
| AC                 | 1457                                      | 87.5                                           | 623                                       | 75.0                                           |
| Education          | 1501                                      | 90.1                                           | 712                                       | 85.7                                           |
| Quantitative       | 1006                                      | 60.4                                           | 460                                       | 55.4                                           |
| Positive           | 1666                                      | 100.0                                          | 831                                       | 100.0                                          |
| Negative           | 141                                       | 8.5                                            | 33                                        | 4.0                                            |

Note: Differences in sum scores and sums of D-ACE facets of subfacets of AC result from documents' significance scores larger 0 in multiple AC subfacets.

## Appendix F

Table 5: Top 10 ranked words by word-topic probability  $\theta$  of each of  $k = 4$  extracted topics of  $n = 831$  documents researching D-ACE excluding documents researching video games.

| Rank                              | Topics                     |            |            |             |
|-----------------------------------|----------------------------|------------|------------|-------------|
|                                   | 1                          | 2          | 3          | 4           |
| 1                                 | User                       | Digital    | Learn      | Culture     |
| 2                                 | Online                     | Read       | Computer   | Media       |
| 3                                 | Social                     | Video      | Education  | Internet    |
| 4                                 | Socialmedia <sup>a</sup>   | Music      | Student    | Selfie      |
| 5                                 | Facebook                   | Book       | Interact   | Mobile      |
| 6                                 | Behavior                   | Student    | Art        | Image       |
| 7                                 | Engage                     | Technology | Teach      | Visual      |
| 8                                 | Socialnetwork <sup>a</sup> | Children   | Museum     | Draw        |
| 9                                 | Motivation                 | Write      | Virtual    | Photography |
| 10                                | Blog                       | Cognitive  | Technology | Phone       |
| Mean Document-Topic Probabilities | 25.98%                     | 24.24%     | 25.20%     | 24.58%      |

Note: <sup>a</sup> : Social media and social network are fixed terms, that have been grouped together via parsing.

Table 6: Top 10 ranked words by word-topic probability  $\theta$  of each of  $k = 6$  extracted topics of  $n = 831$  documents researching D-ACE excluding documents researching video games.

| Rank                              | Topics                     |                          |            |            |            |             |
|-----------------------------------|----------------------------|--------------------------|------------|------------|------------|-------------|
|                                   | 1                          | 2                        | 3          | 4          | 5          | 6           |
| 1                                 | Online                     | User                     | Read       | Video      | Learn      | Digital     |
| 2                                 | Social                     | Socialmedia <sup>a</sup> | Student    | Music      | Education  | Culture     |
| 3                                 | Internet                   | Twitter                  | Book       | Computer   | Art        | Selfie      |
| 4                                 | Student                    | Engage                   | Interact   | Mobile     | Virtual    | Photography |
| 5                                 | Facebook                   | Technology               | Write      | Technology | Teach      | Image       |
| 6                                 | Behavior                   | Motivation               | Technology | Cognitive  | Museum     | Media       |
| 7                                 | Engage                     | Visual                   | Blog       | Phone      | Interact   | Motivation  |
| 8                                 | Socialnetwork <sup>a</sup> | Knowledge                | Children   | Visual     | Children   | Draw        |
| 9                                 | Adolescent                 | Affect                   | School     | Knowledge  | School     | Picture     |
| 10                                | Blog                       | Emotion                  | University | Youtube    | Exhibition | Film        |
| Mean Document-Topic Probabilities | 16.75%                     | 16.71%                   | 16.64%     | 16.45%     | 16.79      | 16.66       |

Note: <sup>a</sup> : Social media and social network are fixed terms, that have been grouped together via parsing.

Table 7: Top 5 ranked words by word-topic probability  $\theta$  of each of  $k = 12$  extracted topics of  $n = 831$  documents researching D-ACE excluding documents researching video games. Only the top 5 words were utilized, as word-topic probability  $\theta$  decreased substantially for words ranked lower.

| Topics |                            |                          |            |                            |          |              |
|--------|----------------------------|--------------------------|------------|----------------------------|----------|--------------|
| Rank   | 1                          | 2                        | 3          | 4                          | 5        | 6            |
| 1      | Facebook                   | Socialmedia <sup>a</sup> | Mobile     | Video                      | Read     | Digital      |
| 2      | User                       | Write                    | Art        | User                       | Book     | Social       |
| 3      | Social                     | Draw                     | Technology | Blog                       | Student  | Technology   |
| 4      | Motivation                 | Twitter                  | Education  | Visual                     | Children | Engage       |
| 5      | Socialnetwork <sup>a</sup> | Engage                   | Visual     | Engage                     | School   | Storytelling |
| Topics |                            |                          |            |                            |          |              |
| Rank   | 7                          | 8                        | 9          | 10                         | 11       | 12           |
| 1      | Learn                      | Music                    | Interact   | Internet                   | Selfie   | Culture      |
| 2      | Student                    | Computer                 | Museum     | Online                     | Image    | Media        |
| 3      | Teach                      | Technology               | Virtual    | Social                     | Photo    | Online       |
| 4      | Education                  | Song                     | User       | Socialnetwork <sup>a</sup> | Media    | Education    |
| 5      | Motivation                 | Software                 | Technology | Behavior                   | Picture  | Behavior     |

Note: <sup>a</sup> : Social media and social network are fixed terms, that have been grouped together via parsing.
